# Supplementary material for: Trends in postpartum hemorrhage from 2000 to 2009: a population-based study
Source: PubMed Central journal article supplement (PMC3534600; doi:10.1186/1471-2393-12-108), 2012-10-11
Supplement: 1471-2393-12-108-S1.pdf [file 1471-2393-12-108-S1.pdf]

**Table 1. Temporal trends in postpartum hemorrhage (PPH), PPH subtypes, severe PPH and severe atonic PPH in British Columbia, 2000-2009.**

|                                                        | All years      | PPH rate |      |      |      | 2009 vs. 2000/2001 |              | P for trend <sup>2</sup> |
|--------------------------------------------------------|----------------|----------|------|------|------|--------------------|--------------|--------------------------|
|                                                        | n <sup>1</sup> | 2000     | 2001 | 2008 | 2009 | RR                 | 95% CI       |                          |
| <b>PPH (rates per 100 deliveries):</b>                 |                |          |      |      |      |                    |              |                          |
| All PPH                                                | 28221          | 6.3      | 6.3  | 8.2  | 8.0  | 1.27               | 1.21 - 1.34  | <0.001                   |
| Due to retained placenta                               | 4859           | 1.3      | 1.2  | 1.3  | 1.3  | 1.02               | 0.90 - 1.15  | 0.81                     |
| Atonic                                                 | 22100          | 4.8      | 4.8  | 6.6  | 6.3  | 1.33               | 1.26 - 1.41  | <0.001                   |
| Secondary                                              | 1276           | 0.25     | 0.34 | 0.29 | 0.35 | 1.40               | 1.09 - 1.81  | 0.27                     |
| Due to coagulation defects                             | 178            | 0.05     | 0.05 | 0.05 | 0.03 | 0.51               | 0.25 - 1.05  | 0.14                     |
| <b>Severe PPH (rates per 10,000 deliveries):</b>       |                |          |      |      |      |                    |              |                          |
| PPH + blood transfusion                                | 1468           | 29.1     | 30.3 | 45.1 | 42.5 | 1.46               | 1.16 - 1.84  | <0.001                   |
| PPH + hysterectomy                                     | 215            | -        | 4.8  | 7.1  | 4.7  | 0.99               | 0.53 - 1.84  | 0.76                     |
| PPH + suturing of uterus                               | 65             | -        | 0    | 3.4  | 3.2  | -                  | -            | <0.001                   |
| PPH + bimanual compression and massage                 | 2255           | -        | 27.7 | 98.1 | 95.6 | 3.45               | 2.79 - 4.25  | <0.001                   |
| PPH + uterine (and vaginal) packing                    | 223            | -        | 4.0  | 6.4  | 8.1  | 2.02               | 1.12 - 3.63  | 0.02                     |
| PPH + ligation of pelvic vessels                       | 81             | -        | 1.3  | 3.9  | 4.5  | 3.58               | 1.34 - 9.55  | <0.001                   |
| PPH + embolization of pelvic vessels                   | 60             | -        | 0.50 | 2.5  | 1.4  | 2.69               | 0.54 - 13.32 | 0.01                     |
| PPH + Suture, ligation, or embolization                | 186            | -        | 1.8  | 9.1  | 7.0  | 3.97               | 1.75 - 9.01  | <0.001                   |
| <b>Severe atonic PPH (rates per 10,000 deliveries)</b> |                |          |      |      |      |                    |              |                          |
| Atonic PPH + blood transfusion                         | 876            | 17.8     | 16.6 | 28.2 | 25.5 | 1.43               | 1.07 - 1.93  | <0.001                   |
| Atonic PPH + hysterectomy                              | 108            | -        | 2.5  | 3.6  | 1.8  | 0.72               | 0.28 - 1.81  | 0.37                     |
| Atonic PPH + suturing of uterus                        | 55             | -        | 0    | 2.7  | 2.9  | -                  | -            | <0.001                   |
| Atonic PPH + bimanual compression and massage          | 1964           | -        | 23.5 | 85.3 | 81.8 | 3.49               | 2.78 - 4.38  | <0.001                   |
| Atonic PPH + uterine (and vaginal) packing             | 174            | -        | 3.0  | 5.9  | 5.9  | 1.93               | 0.97 - 3.82  | 0.02                     |
| Atonic PPH + ligation of pelvic vessels                | 68             | -        | 1.3  | 3.9  | 3.6  | 2.87               | 1.05 - 7.83  | <0.001                   |
| Atonic PPH + embolization of pelvic vessels            | 43             | -        | 0.50 | 2.0  | 1.1  | 2.24               | 0.43 - 11.55 | 0.01                     |
| Atonic PPH + Suture, ligation, or embolization         | 150            | -        | 1.8  | 8.0  | 5.6  | 3.20               | 1.38 - 7.40  | <0.001                   |

<sup>1</sup>n refers to number of cases of the outcome of interest.

<sup>2</sup>P value based on data for all years between 2000 (or 2001) and 2009.

RR denotes rate ratio and 95% CI denotes 95% confidence intervals.

**Table 2. Atonic postpartum hemorrhage by region and hospital volume, British Columbia, 2000-2009.**

| Region (by health authority of mother's residence) | All years      |      | Rate per 100 deliveries by year |      |      |      | 2009 vs. 2000 |           | P for trend <sup>2</sup> |
|----------------------------------------------------|----------------|------|---------------------------------|------|------|------|---------------|-----------|--------------------------|
|                                                    | n <sup>1</sup> | rate | 2000                            | 2001 | 2008 | 2009 | RR            | 95% CI    |                          |
| Fraser                                             | 8340           | 5.2  | 5.0                             | 4.9  | 6.6  | 6.0  | 1.19          | 1.09-1.30 | <0.001                   |
| Interior                                           | 2769           | 4.7  | 3.9                             | 3.4  | 5.8  | 7.0  | 1.81          | 1.54-2.11 | <0.001                   |
| Northern                                           | 1694           | 4.9  | 5.2                             | 4.8  | 5.6  | 4.1  | 0.79          | 0.64-0.97 | 0.03                     |
| Vancouver Coastal                                  | 6995           | 7.1  | 5.4                             | 6.0  | 8.8  | 8.3  | 1.55          | 1.39-1.72 | <0.001                   |
| Vancouver Island                                   | 2206           | 3.7  | 3.8                             | 3.8  | 4.4  | 4.9  | 1.29          | 1.09-1.53 | <0.001                   |
| <b>Hospital Volume (by deliveries per year)</b>    |                |      |                                 |      |      |      |               |           |                          |
| <500                                               | 2537           | 4.5  | 5.0                             | 4.1  | 5.6  | 5.2  | 1.04          | 0.88-1.23 | <0.001                   |
| 500-999                                            | 2363           | 4.6  | 3.8                             | 4.0  | 5.6  | 5.6  | 1.49          | 1.27-1.75 | <0.001                   |
| 1000-1499                                          | 3369           | 4.2  | 5.6                             | 4.4  | 5.3  | 4.0  | 0.71          | 0.61-0.84 | 0.88                     |
| 1500-2499                                          | 3851           | 6.3  | 1.5                             | 4.9  | 8.4  | 8.2  | 5.45          | 4.30-6.92 | <0.001                   |
| ≥2500                                              | 9980           | 6.1  | 5.6                             | 5.5  | 6.8  | 6.5  | 1.15          | 1.05-1.25 | <0.001                   |

<sup>1</sup>n refers to number of cases of atonic postpartum hemorrhage.

<sup>2</sup>P value based on data for all years between 2000 and 2009.

RR denotes rate ratio and 95% CI denotes 95% confidence intervals.

**Table 3. Temporal Trends in atonic postpartum hemorrhage by maternal, fetal and obstetrical characteristics, British Columbia, 2000-2009.**

|                                          | All years      |      | Rate per 100 deliveries |      |      |      | 2009 vs. 2000 |           | P for trend <sup>2</sup> |
|------------------------------------------|----------------|------|-------------------------|------|------|------|---------------|-----------|--------------------------|
|                                          | n <sup>1</sup> | rate | 2000                    | 2001 | 2008 | 2009 | RR            | 95% CI    |                          |
| <b>Parity</b>                            |                |      |                         |      |      |      |               |           |                          |
| Nulliparous                              | 12,237         | 6.5  | 5.5                     | 5.5  | 8.1  | 7.6  | 1.39          | 1.29-1.51 | <0.001                   |
| Parous                                   | 9,863          | 4.4  | 4.2                     | 4.2  | 5.3  | 5.2  | 1.24          | 1.14-1.35 | <0.001                   |
| <b>Maternal age (years)</b>              |                |      |                         |      |      |      |               |           |                          |
| <20                                      | 953            | 6.2  | 6.1                     | 5.0  | 8.5  | 7.6  | 1.26          | 0.97-1.62 | <0.001                   |
| 20-34                                    | 16,641         | 5.4  | 4.8                     | 4.8  | 6.6  | 6.4  | 1.34          | 1.26-1.43 | <0.001                   |
| ≥35                                      | 4,506          | 5.2  | 4.4                     | 4.7  | 6.3  | 5.9  | 1.34          | 1.18-1.53 | <0.001                   |
| <b>BMI</b>                               |                |      |                         |      |      |      |               |           |                          |
| Underweight                              | 1,032          | 6.0  | 4.8                     | 5.2  | 7.4  | 6.8  | 1.43          | 1.09-1.87 | <0.001                   |
| Normal                                   | 9,960          | 5.7  | 5.1                     | 5.1  | 6.9  | 6.8  | 1.33          | 1.22-1.47 | <0.001                   |
| Overweight                               | 2,977          | 5.1  | 4.5                     | 4.5  | 6.2  | 6.2  | 1.39          | 1.19-1.62 | <0.001                   |
| Obese                                    | 1,583          | 4.9  | 4.2                     | 4.4  | 6.4  | 5.5  | 1.31          | 1.06-1.63 | <0.001                   |
| <b>Plurality</b>                         |                |      |                         |      |      |      |               |           |                          |
| Singleton                                | 21,529         | 5.3  | 4.7                     | 4.7  | 6.5  | 6.3  | 1.33          | 1.25-1.41 | <0.001                   |
| Multiple                                 | 571            | 9.2  | 7.1                     | 10.8 | 11.3 | 9.4  | 1.33          | 0.91-1.95 | <0.001                   |
| <b>Birthweight (grams)</b>               |                |      |                         |      |      |      |               |           |                          |
| <2500                                    | 794            | 3.7  | 3.2                     | 4.0  | 5.0  | 3.7  | 1.17          | 0.85-1.61 | 0.03                     |
| 2500-3999                                | 17,353         | 5.2  | 4.5                     | 4.5  | 6.3  | 6.2  | 1.37          | 1.29-1.47 | <0.001                   |
| ≥4000                                    | 3,939          | 7.2  | 6.6                     | 6.4  | 9.1  | 8.2  | 1.24          | 1.09-1.41 | <0.001                   |
| <b>Gestational age (weeks)</b>           |                |      |                         |      |      |      |               |           |                          |
| <28                                      | 68             | 2.0  | 2.14                    | 0.69 | 3.13 | 1.5  | 0.71          | 0.25-2.01 | 0.53                     |
| 28-36                                    | 1,477          | 4.5  | 3.3                     | 4.2  | 6.0  | 5.2  | 1.55          | 1.21-1.97 | <0.001                   |
| 37-41                                    | 20,115         | 5.5  | 4.9                     | 4.8  | 6.7  | 6.5  | 1.33          | 1.25-1.41 | <0.001                   |
| ≥42                                      | 396            | 6.2  | 5.8                     | 5.3  | 6.9  | 5.9  | 1.03          | 0.68-1.57 | 0.52                     |
| <b>Vaginal delivery</b>                  |                |      |                         |      |      |      |               |           |                          |
| Spontaneous                              | 14,400         | 5.8  | 5.1                     | 5.2  | 7.1  | 6.8  | 1.33          | 1.24-1.42 | <0.001                   |
| Instrumental                             | 5,141          | 11.5 | 8.9                     | 10.3 | 14.6 | 14.2 | 1.59          | 1.42-1.79 | <0.001                   |
| <b>Cesarean delivery</b>                 |                |      |                         |      |      |      |               |           |                          |
| No labour                                | 912            | 1.7  | 1.6                     | 1.3  | 2.1  | 2.1  | 1.28          | 0.94-1.73 | <0.001                   |
| With labour, no induction                | 1,001          | 2.4  | 1.6                     | 1.5  | 3.5  | 3.0  | 1.92          | 1.43-2.58 | <0.001                   |
| With induction                           | 646            | 2.9  | 1.9                     | 1.5  | 3.9  | 3.5  | 1.74          | 1.20-2.54 | <0.001                   |
| <b>Previous cesarean</b>                 |                |      |                         |      |      |      |               |           |                          |
| Yes                                      | 1,426          | 2.5  | 2.7                     | 2.3  | 3.2  | 2.9  | 1.08          | 0.86-1.34 | 0.001                    |
| No                                       | 20,674         | 5.8  | 5.1                     | 5.1  | 7.2  | 6.9  | 1.37          | 1.30-1.46 | <0.001                   |
| <b>Induction of labour</b>               |                |      |                         |      |      |      |               |           |                          |
| Yes                                      | 5,648          | 6.4  | 5.4                     | 5.4  | 8.4  | 7.7  | 1.41          | 1.26-1.58 | <0.001                   |
| No                                       | 16,452         | 5.1  | 4.6                     | 4.6  | 6.1  | 6.0  | 1.31          | 1.22-1.40 | <0.001                   |
| <b>Augmentation of labour (oxytocin)</b> |                |      |                         |      |      |      |               |           |                          |
| Yes                                      | 4,561          | 7.2  | 5.7                     | 6.1  | 8.9  | 8.1  | 1.41          | 1.24-1.61 | <0.001                   |
| No                                       | 17,539         | 5.0  | 4.6                     | 4.5  | 6.1  | 6.0  | 1.31          | 1.23-1.39 | <0.001                   |
| <b>Epidural analgesia</b>                |                |      |                         |      |      |      |               |           |                          |
| Yes                                      | 8,096          | 7.0  | 5.4                     | 6.0  | 9.0  | 7.8  | 1.44          | 1.30-1.59 | <0.001                   |
| No                                       | 14,004         | 4.7  | 4.6                     | 4.3  | 5.6  | 5.8  | 1.27          | 1.19-1.36 | <0.001                   |

<sup>1</sup>n refers to number of cases of atonic postpartum hemorrhage.

<sup>2</sup>P value based on data for all years between 2000 and 2009.

RR denotes rate ratio and 95% CI denotes 95% confidence intervals.

**Table 4. Temporal Trends in atonic postpartum hemorrhage with blood transfusion by maternal, fetal and obstetrical characteristics, British Columbia, 2000-2009.**

|                                          | All years      |      | Rate per 10,000 deliveries |       |       |      | 2009 vs. 2000 |            | P for trend <sup>2</sup> |
|------------------------------------------|----------------|------|----------------------------|-------|-------|------|---------------|------------|--------------------------|
|                                          | n <sup>1</sup> | rate | 2000                       | 2001  | 2008  | 2009 | RR            | 95% CI     |                          |
| <b>Parity</b>                            |                |      |                            |       |       |      |               |            |                          |
| Nulliparous                              | 534            | 15.3 | 20.1                       | 19.9  | 39.5  | 31.3 | 1.56          | 1.04-2.34  | <0.001                   |
| Parous                                   | 342            | 28.3 | 16.0                       | 14.1  | 18.3  | 20.4 | 1.28          | 0.83-1.98  | 0.04                     |
| <b>Maternal Age (in years)</b>           |                |      |                            |       |       |      |               |            |                          |
| <20                                      | 56             | 36.6 | 27.3                       | 28.6  | 47.7  | 55.8 | 2.05          | 0.67-6.24  | 0.07                     |
| 20-34                                    | 612            | 19.8 | 15.8                       | 15.0  | 27.3  | 25.5 | 1.61          | 1.13-2.30  | <0.001                   |
| ≥35                                      | 208            | 23.8 | 23.4                       | 20.4  | 28.4  | 21.2 | 0.91          | 0.48-1.70  | 0.41                     |
| <b>BMI</b>                               |                |      |                            |       |       |      |               |            |                          |
| Underweight                              | 41             | 23.9 | 10.4                       | 26.4  | 25.5  | 18.4 | 1.78          | 0.30-10.62 | 0.10                     |
| Normal                                   | 362            | 20.6 | 16.3                       | 19.1  | 30.4  | 20.4 | 1.25          | 0.77-2.03  | 0.03                     |
| Overweight                               | 115            | 19.8 | 17.3                       | 13.6  | 25.0  | 24.1 | 1.39          | 0.62-3.08  | 0.02                     |
| Obese                                    | 58             | 17.8 | 10.1                       | 6.5   | 27.3  | 18.6 | 1.85          | 0.48-7.14  | 0.09                     |
| <b>Plurality</b>                         |                |      |                            |       |       |      |               |            |                          |
| Singleton                                | 832            | 20.5 | 17.0                       | 15.3  | 27.0  | 24.8 | 1.46          | 1.07-1.97  | <0.001                   |
| Multiple                                 | 44             | 70.7 | 76.3                       | 113.9 | 105.6 | 68.0 | 0.89          | 0.24-3.30  | 0.84                     |
| <b>Birthweight (in grams)</b>            |                |      |                            |       |       |      |               |            |                          |
| <2500                                    | 59             | 27.8 | 5.1                        | 59.2  | 39.4  | 29.9 | 5.92          | 0.73-48.08 | 0.69                     |
| 2500-3999                                | 637            | 19.0 | 17.2                       | 13.8  | 22.5  | 22.0 | 1.28          | 0.91-1.81  | 0.002                    |
| ≥4000                                    | 177            | 32.3 | 26.0                       | 18.8  | 58.3  | 45.4 | 1.75          | 0.92-3.32  | <0.001                   |
| <b>Gestational age (in weeks)</b>        |                |      |                            |       |       |      |               |            |                          |
| <28                                      | 7              | 20.1 | 0.0                        | 34.5  | 24.0  | 21.8 | -             | -          | 0.69                     |
| 28-36                                    | 110            | 33.8 | 25.1                       | 36.6  | 45.7  | 46.4 | 1.85          | 0.77-4.45  | 0.05                     |
| 37-41                                    | 739            | 20.0 | 17.1                       | 15.3  | 27.0  | 23.3 | 1.37          | 0.99-1.89  | <0.001                   |
| ≥42                                      | 17             | 26.6 | 35.2                       | 0.0   | 16.5  | 34.0 | 0.96          | 0.16-5.75  | 0.61                     |
| <b>Vaginal delivery</b>                  |                |      |                            |       |       |      |               |            |                          |
| Spontaneous                              | 321            | 12.9 | 11.8                       | 10.2  | 17.6  | 16.4 | 1.39          | 0.87-2.21  | 0.004                    |
| Instrumental                             | 244            | 54.7 | 31.2                       | 41.4  | 73.3  | 73.6 | 2.36          | 1.29-4.32  | <0.001                   |
| <b>Cesarean delivery</b>                 |                |      |                            |       |       |      |               |            |                          |
| No labour                                | 110            | 20.7 | 26.9                       | 18.1  | 21.5  | 24.7 | 0.92          | 0.41-2.04  | 0.57                     |
| With labour, no induction                | 129            | 30.4 | 31.2                       | 30.0  | 33.7  | 29.0 | 0.93          | 0.43-2.01  | 0.59                     |
| With induction                           | 72             | 32.2 | 20.3                       | 9.3   | 65.0  | 28.8 | 1.42          | 0.42-4.83  | 0.01                     |
| <b>Previous cesarean</b>                 |                |      |                            |       |       |      |               |            |                          |
| Yes                                      | 111            | 19.8 | 29.5                       | 18.4  | 27.6  | 29.1 | 0.99          | 0.50-1.97  | 0.60                     |
| No                                       | 765            | 21.5 | 16.2                       | 16.4  | 28.3  | 24.9 | 1.53          | 1.10-2.13  | <0.001                   |
| <b>Induction of labour</b>               |                |      |                            |       |       |      |               |            |                          |
| Yes                                      | 236            | 26.9 | 19.9                       | 18.9  | 44.3  | 31.3 | 1.57          | 0.86-2.86  | 0.002                    |
| No                                       | 640            | 19.7 | 17.3                       | 16.0  | 24.1  | 24.0 | 1.39          | 0.99-1.96  | <0.001                   |
| <b>Augmentation of labour (oxytocin)</b> |                |      |                            |       |       |      |               |            |                          |
| Yes                                      | 172            | 27.3 | 23.2                       | 15.4  | 38.4  | 38.0 | 1.64          | 0.86-3.12  | <0.001                   |
| No                                       | 704            | 20.2 | 16.9                       | 16.9  | 26.2  | 23.1 | 1.37          | 0.98-1.92  | <0.001                   |
| <b>Epidural analgesia</b>                |                |      |                            |       |       |      |               |            |                          |
| Yes                                      | 340            | 29.4 | 23.4                       | 20.9  | 40.2  | 35.4 | 1.51          | 0.92-2.48  | <0.001                   |
| No                                       | 536            | 18.1 | 15.9                       | 15.1  | 23.2  | 21.4 | 1.35          | 0.93-1.96  | 0.003                    |

<sup>1</sup>n refers to number of cases of atonic postpartum hemorrhage with blood transfusion.

<sup>2</sup>P value based on data for all years between 2000 and 2009.

RR denotes rate ratio and 95% CI denotes 95% confidence intervals.
